# Supplementary material
Source: HighWire-hosted journal article supplement (http://cmajopen.ca/highwire/filestream/81179/field_highwire_adjunct_files/0/2017-0077_Original_submission.pdf)
Supplement: 2017-0077_Original_submission.pdf [file 2017-0077_Original_submission.pdf]

## Manual Review of Electronic Medical Records as a Reference Standard for Case Definition Development

|                               |                                                                                                                                                                                                                                                                                                                                                                                                                                                                                                                                                                                                                                                                                                                                                                                                                                                                                                                                                                                                                                                                                                                                                                                                                                                                                                                                                                                                             |
|-------------------------------|-------------------------------------------------------------------------------------------------------------------------------------------------------------------------------------------------------------------------------------------------------------------------------------------------------------------------------------------------------------------------------------------------------------------------------------------------------------------------------------------------------------------------------------------------------------------------------------------------------------------------------------------------------------------------------------------------------------------------------------------------------------------------------------------------------------------------------------------------------------------------------------------------------------------------------------------------------------------------------------------------------------------------------------------------------------------------------------------------------------------------------------------------------------------------------------------------------------------------------------------------------------------------------------------------------------------------------------------------------------------------------------------------------------|
| Journal:                      | <i>CMAJ Open</i>                                                                                                                                                                                                                                                                                                                                                                                                                                                                                                                                                                                                                                                                                                                                                                                                                                                                                                                                                                                                                                                                                                                                                                                                                                                                                                                                                                                            |
| Manuscript ID                 | CMAJOpen-2017-0077                                                                                                                                                                                                                                                                                                                                                                                                                                                                                                                                                                                                                                                                                                                                                                                                                                                                                                                                                                                                                                                                                                                                                                                                                                                                                                                                                                                          |
| Manuscript Type:              | Cohort (retrospective)                                                                                                                                                                                                                                                                                                                                                                                                                                                                                                                                                                                                                                                                                                                                                                                                                                                                                                                                                                                                                                                                                                                                                                                                                                                                                                                                                                                      |
| Date Submitted by the Author: | 16-Jun-2017                                                                                                                                                                                                                                                                                                                                                                                                                                                                                                                                                                                                                                                                                                                                                                                                                                                                                                                                                                                                                                                                                                                                                                                                                                                                                                                                                                                                 |
| Complete List of Authors:     | Williamson, Tyler; University of Calgary, Community Health Sciences<br>Miyagishima, Rebecca; University of Alberta, School of Public Health<br>Derochie, Janeen; University of Calgary, Community Health Sciences<br>Drummond, Neil; University of Alberta, Family Medicine; University of Calgary, Family Medicine                                                                                                                                                                                                                                                                                                                                                                                                                                                                                                                                                                                                                                                                                                                                                                                                                                                                                                                                                                                                                                                                                         |
| Keywords:                     | Epidemiology, Family medicine, general practice, primary care, Medical informatics, Statistics and research methods                                                                                                                                                                                                                                                                                                                                                                                                                                                                                                                                                                                                                                                                                                                                                                                                                                                                                                                                                                                                                                                                                                                                                                                                                                                                                         |
| More Detailed Keywords:       | validation studies                                                                                                                                                                                                                                                                                                                                                                                                                                                                                                                                                                                                                                                                                                                                                                                                                                                                                                                                                                                                                                                                                                                                                                                                                                                                                                                                                                                          |
| Abstract:                     | <p>Background: The adoption of electronic medical records (EMR) in Canadian primary care provides a valuable opportunity for research and surveillance. To facilitate rigor in the surveillance of chronic disease in Canada, the Canadian Primary Care Sentinel Surveillance Network (CPCSSN) has previously undertaken a validation study of case definitions using direct review of 'raw' EMR data. While effective, this method is time-consuming and can present methodological and organizational challenges. We aimed to determine whether the processed and standardized data contained with the CPCSSN database might function as a reference standard for case definition validation.</p> <p>Methods: We compared the case identification results of the chart reviews for eight chronic diseases in 1906 patients with the results of a manual review of the CPCSSN processed data for the same conditions in the same patient sample.</p> <p>Results: A manual review of the CPCSSN records for case ascertainment yielded sensitivity ranging from 77.5% (depression) to 97.2% (diabetes), while specificity was high for all definitions ranging from 92.6% (COPD) to 99.4% (parkinsonism). Positive and negative predictive values (PPV and NPV) demonstrated high accuracy of the manual CPCSSN record review relative to review of the raw chart data. PPV ranged from 83.3% (COPD) to</p> |

1  
2  
3  
4  
5  
6  
7  
8  
9  
10  
11  
12  
13  
14  
15  
16  
17  
18  
19  
20  
21  
22  
23  
24  
25  
26  
27  
28  
29  
30  
31  
32  
33  
34  
35  
36  
37  
38  
39  
40  
41  
42  
43  
44  
45  
46  
47  
48  
49  
50  
51  
52  
53  
54  
55  
56  
57  
58  
59  
60

|  |                                                                                                                                                                                                                                                                                                                                                                                          |
|--|------------------------------------------------------------------------------------------------------------------------------------------------------------------------------------------------------------------------------------------------------------------------------------------------------------------------------------------------------------------------------------------|
|  | 93.3% (hypertension) and NPV ranged from 92.4% (osteoarthritis) to 99.7% (epilepsy).<br>Interpretation: The use of CPCSSN records as the reference standard to validate case definitions significantly reduces the burden on sentinel physicians and clinic managers, as well as on researchers, while offering a reference standard that is a reasonable substitution for chart review. |
|  |                                                                                                                                                                                                                                                                                                                                                                                          |

SCHOLARONE™  
Manuscripts

Confidential

1  
2  
3 Manual Review of Electronic Medical Records as a Reference Standard for Case Definition  
4 Development  
5  
6

7 Williamson T, Miyagishima RC, Derochie JD, Drummond N  
8

9 **Abstract**

10  
11 **Background:** The adoption of electronic medical records (EMR) in Canadian primary care  
12 provides a valuable opportunity for research and surveillance. To facilitate rigor in the  
13 surveillance of chronic disease in Canada, the Canadian Primary Care Sentinel Surveillance  
14 Network (CPCSSN) has previously undertaken a validation study of case definitions using  
15 direct review of 'raw' EMR data. While effective, this method is time-consuming and can  
16 present methodological and organizational challenges. We aimed to determine whether the  
17 processed and standardized data contained with the CPCSSN database might function as a  
18 reference standard for case definition validation.  
19  
20  
21  
22  
23  
24  
25  
26

27 **Methods:** We compared the case identification results of the chart reviews for eight  
28 chronic diseases in 1906 patients with the results of a manual review of the CPCSSN  
29 processed data for the same conditions in the same patient sample.  
30  
31  
32

33 **Results:** A manual review of the CPCSSN records for case ascertainment yielded sensitivity  
34 ranging from 77.5% (depression) to 97.2% (diabetes), while specificity was high for all  
35 definitions ranging from 92.6% (COPD) to 99.4% (parkinsonism). Positive and negative  
36 predictive values (PPV and NPV) demonstrated high accuracy of the manual CPCSSN record  
37 review relative to review of the raw chart data. PPV ranged from 83.3% (COPD) to 93.3%  
38 (hypertension) and NPV ranged from 92.4% (osteoarthritis) to 99.7% (epilepsy).  
39  
40  
41  
42  
43  
44

45 **Interpretation:** The use of CPCSSN records as the reference standard to validate case  
46 definitions significantly reduces the burden on sentinel physicians and clinic managers, as  
47 well as on researchers, while offering a reference standard that is a reasonable substitution  
48 for chart review.  
49  
50  
51  
52  
53  
54  
55  
56  
57  
58  
59  
60

## Introduction

The adoption of electronic medical records (EMRs) in Canadian primary care practices provides a valuable opportunity to develop research and surveillance-related information<sup>1</sup>. The Canadian Primary Care Sentinel Surveillance Network (CPCSSN) is Canada's only pan-Canadian primary care EMR database. CPCSSN currently holds de-identified records on 1.5M Canadian primary care patients from 1200 sentinel family physicians, nurse practitioners and community pediatricians, in 11 provinces or territories and from 10 different EMR systems. To facilitate rigor in the surveillance of chronic disease in Canada, CPCSSN has previously undertaken a large-scale validation study of case definitions for eight chronic diseases (diabetes, hypertension, osteoarthritis, depression, dementia, chronic obstructive pulmonary disease (COPD), parkinsonism, and epilepsy)<sup>2</sup>, which were implemented in the CPCSSN database using computerized algorithms which extract, clean and process the data into a standard format. The case definitions were validated using the accepted reference standard method of manual review of the patient's source electronic medical record. Validation results were favorable for all case definitions, with sensitivity ranging from 77.8 to 98.8, specificity from 93.5 to 99.0, PPV from 72.1 to 92.9 and NPV from 90.2 to 99.9.

While effective, this method of validation is time-consuming and can present challenges to researchers. Access to patient charts must be coordinated with participating clinics, requiring increased time commitment and workload from clinic administrators. Further, there is potential risk to patient privacy and data security which requires additional safeguards to be implemented both by researchers and clinic administrative staff. Thus, it is practical and reasonable to explore alternative sources of reference standard information for use in validation studies. The utility of clinical databases as a reference standard depends upon the effectiveness of the database in representing the information originally contained in the patient charts, as well as the scope of the data available from those charts, given technological and legal constraints. The usefulness of a database as a reference standard may also be condition-specific. A disease may be easily examined within one clinical database but remain obscure for even basic information in another. We aimed

1  
2  
3 to determine whether the data contained with the CPCSSN records might function as a  
4 reference standard for case definition validation.  
5  
6  
7  
8  
9

## 10 **Methods**

11  
12  
13 In this cross-sectional case definition validation study, we employed the same sample of  
14 1906 patients used in our initial validation study. At the time of that study, the CPCSSN  
15 database housed data for 600,000 patients extracted from the EMRs of 475 sentinels. Six  
16 out of the ten networks within CPCSSN contributed to the patient sample, which was  
17 random and age-stratified such that 90% of the charts were for patients aged sixty years  
18 and older. Due to low prevalences, the sample was enhanced by 25 additional charts each  
19 for parkinsonism and epilepsy, chosen non-randomly. We compared the case identification  
20 results of the record reviews for the eight chronic diseases in the 1906 patients with the  
21 results of an independent manual review of the CPCSSN processed data for the same  
22 conditions in the same 1906 patients. Note that while the original validation study reported  
23 on 1920 patients, 14 were removed from the dataset for this analysis as their clinic is no  
24 longer participating in CPCSSN.  
25  
26  
27  
28  
29  
30  
31  
32  
33  
34

### 35 **CPCSSN Record Review**

36  
37  
38 Two experienced research assistants, one a nurse and the other an epidemiologist, were  
39 trained to review patient data records within the CPCSSN database and to assess caseness  
40 in each record separately for all 1906 patients, for each of the eight conditions of interest.  
41 Each reviewer received a detailed training document which provided instruction on how to  
42 assess each record for evidence that the patient should be judged as being a case for each  
43 disease. The reviewers were blinded to other assessments of caseness, including the case  
44 assignment by CPCSSN's algorithms and the case determination made by reviewers during  
45 the original validation study. Reviewers were instructed to examine all aspects of the  
46 patient's CPCSSN record to find evidence for caseness, including the list of health  
47 conditions, encounter information, medication list, laboratory results, and billing data.  
48  
49 Additionally, reviewers could see both the original and cleaned text entries as well as ICD-9  
50  
51  
52  
53  
54  
55  
56  
57  
58  
59  
60

1  
2  
3 codes. While the review was undertaken independently by the two reviewers, patients for  
4 which there was uncertainty were discussed with the team's lead (TW) until consensus  
5 was reached. If uncertainty remained, a family physician was consulted for guidance on  
6 how to classify the record in question. This approach to resolving discrepancies, including  
7 the person to whom the discrepancies were brought, was successfully used in the original  
8 study.  
9  
10  
11  
12  
13

### 14 15 Statistical Analysis

16  
17 Measures of validity employed in this study were sensitivity, specificity, positive predictive  
18 value (PPV) and negative predictive value (NPV). These were calculated by comparing the  
19 outcomes of the manual CPCSSN record review with the outcomes of the original manual  
20 review of the EMR charts. In accordance with the methodology used in Williamson et al.  
21 (2014), 70% was considered the cut-off for validity for all measures for sensitivity and  
22 specificity. No cut-off value was assigned for PPV or NPV. Additionally, patient  
23 demographic information including age, sex and site (that is, the clinic from which a  
24 patient's data was extracted) were assessed. All data were analyzed using Stata/IC (Version  
25 13) statistical software.<sup>3</sup>  
26  
27  
28  
29  
30  
31  
32  
33  
34  
35  
36  
37  
38  
39

### 40 41 Results

42 The analysis was undertaken for all 1906 patients. Table 1 summarizes the patient  
43 characteristics of the sample. The sex of patients included in the study was reflective of the  
44 intention to over-sample older patients, with 44.3% males and 55.7% females in the final  
45 sample. The age of patients ranged from 5 years to 107 years, with 85.5% being over 60  
46 years of age. More than half the patients (50.1%) had a diagnosis noted in the chart  
47 according to the chart review. At the time of chart review (2012) these patients had many  
48 chronic conditions, with only 22.6% of the sample having none of the 8 conditions under  
49 study.  
50  
51  
52  
53  
54

55 Table 2 outlines the results of the validation analysis using the outcome of chart review as  
56 the reference standard. A manual review of the CPCSSN records for case ascertainment  
57  
58  
59  
60

1  
2  
3 yielded sensitivity ranging from 77.5% (depression, 95% CI: 73.3% to 81.6%) to 97.2%  
4 (diabetes, 95% CI: 95.4% to 99.0%), while specificity was high for all definitions and  
5 ranged from 93.1% (hypertension, 95% CI: 94.5% to 97.1%) to 99.4% (parkinsonism, 95%  
6 CI: 99.0% to 99.8%). PPV and NPV demonstrated high accuracy of the manual CPCSSN  
7 record review relative to review of the chart data. PPV ranged from 83.3% (COPD, 95% CI:  
8 77.4% to 89.3%) to 93.3% (hypertension, 95% CI: 91.7% to 94.8%) and NPV ranged from  
9 92.4% (osteoarthritis, 95% CI: 90.9% to 93.8%) to 99.7% (epilepsy, 95% CI: 99.4% to  
10 99.9%). Overall, the case definition for diabetes achieved the highest sensitivity and  
11 specificity (97.2% sensitivity, 95% CI: 95.4% to 99.0%; 97.9% specificity, 95% CI: 97.2% to  
12 98.6%).

## 21 Discussion

22  
23  
24  
25 The results of this study demonstrate that CPCSSN record data may function effectively as a  
26 reference standard for defining caseness. Agreement in case classification between reviews  
27 of CPCSSN records and those of EMR charts was strongest for conditions with the clearest  
28 diagnostic criteria (e.g. diabetes) while conditions with less clear diagnostic rules (e.g.  
29 depression) showed the largest, but still tolerable, discrepancy.

30  
31  
32  
33  
34  
35 The use of clinical databases as a source for reference standard data in case definition  
36 validation is an expanding topic in primary care epidemiology. Valkhoff et al. (2014)  
37 examined billing code and free-text diagnoses of upper gastrointestinal bleeding in two  
38 primary care databases (as well as two administrative databases) based in the Netherlands  
39 (IPCI) and Italy (HSD).<sup>4</sup> Positive predictive values ranged from 21% (18, 26) for IPCI to  
40 78% (72, 83) for HSD. John et al. (2016) validated Read code validity for anxiety and  
41 depression in a Welsh primary care health record database linked with survey results from  
42 a community health inequality survey. The authors reported insufficient validity with  
43 sensitivity ranging from 0.05 to 0.49<sup>5</sup>. The EMRALD database in Ontario, Canada, based on  
44 a single primary care EMR system, has been employed as a reference standard for several  
45 case definition validation studies<sup>6-9</sup>, however these studies tend to validate case definitions  
46 using administrative data with EMR data as the reference standard.

1  
2  
3 Our interest was to validate the CPCSSN record itself as a possible reference standard  
4 against the standard which by convention is generally considered to be preeminent: the  
5 medical chart. Little previous work has been reported which sought to rigorously validate  
6 case definitions developed using processed EMR data in comparison to those achieved  
7 using the conventional reference standard, particularly when linkage to non-primary care  
8 data is not feasible. As such, this study is a significant contribution to both primary care and  
9 health information technology research in the Canadian context. This has major  
10 significance for the development of future case definitions as this will allow researchers to  
11 streamline the work and dramatically reduce time and cost constraints which previously  
12 presented challenges. This work should lead to significant increases in the number of  
13 conditions in the CPCSSN data with validated case definitions, yielding substantial  
14 improvement in the utility of the data for research, surveillance and quality improvement  
15 studies.  
16

17  
18 There are limitations to using an EMR database as a reference standard. EMR-derived data  
19 is subject to the levels of completeness and accuracy of recording by the entering physician.  
20 Missing or erroneous data entered at the clinic-level cannot be addressed by CPCSSN  
21 cleaning or coding processes, nor by researchers utilizing the data<sup>10</sup>. Several records in our  
22 study had to be excluded due to missing data. However, this will be a similar problem when  
23 using chart review as the reference standard. Another limitation relates to the types of data  
24 extracted by CPCSSN from the charts. SOAP notes, referral letters, and diagnostic images  
25 are among those not extracted from the source EMR record for reasons of confidentiality. If  
26 the deterministic information is expected to be found in that type of data then a manual  
27 review of the CPCSSN data will not serve well as a reference standard.  
28

### 29 30 31 32 33 34 35 36 37 38 39 40 41 42 43 44 45 46 47 48 49 50 51 52 53 54 55 56 57 58 59 60

## Conclusions

This study has demonstrated that chart reviews, which are often challenging to researchers due to time and financial constraints, are a sufficient but sometimes unnecessary reference standard. The use of CPCSSN record data to validate case definitions significantly reduces the burden on sentinel physicians and clinic managers, as well as the researchers themselves. This shorter, more cost-effective process for case definition validation will



1  
2  
3 increase the potential for future case definition validation work for a variety of conditions  
4 occurring in primary care settings.  
5  
6  
7  
8  
9  
10  
11  
12  
13  
14  
15

## 16 **References**

- 17  
18 1. Birtwhistle R, Williamson T. Primary care electronic medical records: a new data  
19 source for research in Canada. *CMAJ* 2014; 187(4):239-240.  
20
- 21 2. Williamson T, Green ME, Birtwhistle R, Khan S, Garies S, Wong ST, Natarajan N, Manca  
22 D, Drummond N. Validating the 8 CPCSSN Case Definitions for Chronic Disease  
23 Surveillance in a Primary Care Database of Electronic Health Records. *Ann Fam Med*  
24 2014; 12(4):367-372.  
25
- 26 3. Valkhoff VE, Coloma PM, Masclee GMC, Gini R, Innocenti F, Lapi F, Molokhia M,  
27 Mosseveld M, Nielsson MS, Schuemie M, Thiessard F, van der Lei J, Sturkenboom MCJM,  
28 Trifirò, on behalf of the EU-ADR Consortium. Validation study in four health-care  
29 databases: upper gastrointestinal bleeding misclassification affects precision but not  
30 magnitude of drug-related upper gastrointestinal bleeding risk. *Journal of Clinical*  
31 *Epidemiology* 2014; 67:921-931.  
32
- 33 4. StataCorp. 2013. *Stata Statistical Software: Release 13*. College Station, TX: StataCorp  
34 LP.  
35
- 36 5. John A, McGregor J, Fone D, Dunstan F, Cornish R, Lyons RA, Lloyd KR. Case-finding for  
37 common mental disorders of anxiety and depression in primary care: an external  
38 validation of routinely collected data. *BMC Medical Informatics and Decision Making*  
39 2016; 16:35.  
40
- 41 6. Butt DA, Tu K, Young J, Green D, Wang M, Ivers N, Jaakkimainen L, Lam R, Guttman M. A  
42 Validation Study of Administrative Data Algorithms to Identify Patients with  
43 Parkinsonism with Prevalence and Incidence Trends. *Neuroepidemiology* 2014;  
44 43(1):28-37.  
45  
46  
47  
48  
49  
50  
51  
52  
53  
54  
55  
56  
57  
58  
59  
60

- 1  
2  
3 7. Widdifield J, Bombardier C, Bernatsky S, Paterson JM, Green D, Young J, Ivers N, Butt  
4 AD, Jaakkimainen RL, Thorne JC, Tu K. An administrative data validation study of the  
5 accuracy of algorithms for identifying rheumatoid arthritis: the influence of the  
6 reference standard on algorithm performance. *BMC Musculoskeletal Disorders* 2014;  
7 15:216.  
8
- 9  
10  
11  
12 8. Schwartz KL, Tu K, Wing L, Campitelli MA, Crowcroft NS, Deeks SL, Wilson SE, Wilson K,  
13 Gemmill I, Kwong JC. Validation of infant immunization billing codes in administrative  
14 data. *Human Vaccines & Immunotherapeutics* 2015; 11(7):1840-1847.  
15
- 16  
17  
18 9. Tu K, Wang M, Young J, Green D, Ivers NM, Butt D, Jaakkimainen L, Kapral MK. Validity  
19 of Administrative Data for Identifying Patients Who Have Had a Stroke or Transient  
20 Ischemic Attack Using EMRALD as a Reference Standard. *Canadian Journal of*  
21 *Cardiology* 2013; 29:1388-1394.  
22
- 23  
24  
25 10. Birtwhistle R, Keshavjee K, Lambert-Lanning A, Godwin M, Greiver M, Manca D, Lagacé  
26 C. Building a Pan-Canadian Primary Care Sentinel Surveillance Network: Initial  
27 Development and Moving Forward. *JABFM* 2009; 22(4):412-422.  
28  
29  
30  
31  
32  
33  
34  
35  
36  
37  
38  
39  
40  
41  
42  
43  
44  
45  
46  
47  
48  
49  
50  
51  
52  
53  
54  
55  
56  
57  
58  
59  
60

Table 1: Patient Characteristics

| Patient Characteristics                                   |                 | Percent |
|-----------------------------------------------------------|-----------------|---------|
|                                                           | Male            | 44.3%   |
|                                                           | Age >= 60 years | 85.5%   |
|                                                           |                 |         |
| Disease Prevalence                                        |                 |         |
|                                                           | Hypertension    | 50.1%   |
|                                                           | Diabetes        | 16.8%   |
|                                                           | Depression      | 20.3%   |
|                                                           | COPD            | 7.9%    |
|                                                           | Osteoarthritis  | 31.9%   |
|                                                           | Dementia        | 4.9%    |
|                                                           | Epilepsy        | 7.1%    |
|                                                           | Parkinsonism    | 4.4%    |
|                                                           |                 |         |
| Number of chronic conditions (of the 8 CPCSSN conditions) |                 |         |
|                                                           | 0               | 22.6%   |
|                                                           | 1               | 33.6%   |
|                                                           | 2               | 27.1%   |
|                                                           | 3               | 12.7%   |
|                                                           | 4 or more       | 4.0%    |

1  
2  
3  
4  
5  
6  
7  
8  
9  
10  
11  
12  
13  
14  
15  
16  
17  
18  
19  
20  
21  
22  
23  
24  
25  
26  
27  
28  
29  
30  
31  
32  
33  
34  
35  
36  
37  
38  
39  
40  
41  
42  
43  
44  
45  
46  
47  
48  
49

Table 2: Validation Results

| Condition      | Chart +<br>CPCSSN + | Chart -<br>CPCSSN + | Chart -<br>CPCSSN - | Chart +<br>CPCSSN - | Sensitivity<br>(95% CI) | Specificity<br>(95% CI) | Positive<br>Predictive Value<br>(95% CI) | Negative<br>Predictive Value<br>(95% CI) |
|----------------|---------------------|---------------------|---------------------|---------------------|-------------------------|-------------------------|------------------------------------------|------------------------------------------|
| Hypertension   | 915                 | 66                  | 885                 | 40                  | 95.8%<br>(94.5%, 97.1%) | 93.0%<br>(91.4%, 94.7%) | 93.3%<br>(91.7%, 94.8%)                  | 95.7%<br>(94.4%, 97.0%)                  |
| Diabetes       | 311                 | 33                  | 1553                | 9                   | 97.2%<br>(95.4%, 99.0%) | 97.9%<br>(97.2%, 98.6%) | 90.4%<br>(87.3%, 93.5%)                  | 99.4%<br>(99.0%, 99.8%)                  |
| Depression     | 299                 | 47                  | 1473                | 87                  | 77.5%<br>(73.3%, 81.6%) | 96.9%<br>(96.0%, 97.9%) | 86.4%<br>(82.8%, 90.0%)                  | 94.4%<br>(93.3%, 95.6%)                  |
| COPD           | 125                 | 25                  | 1730                | 26                  | 82.8%<br>(76.8%, 88.8%) | 98.6%<br>(98.0%, 99.1%) | 83.3%<br>(77.4%, 89.3%)                  | 98.5%<br>(98.0%, 99.1%)                  |
| Dementia       | 82                  | 15                  | 1797                | 12                  | 87.2%<br>(80.5%, 94.0%) | 99.2%<br>(98.8%, 99.6%) | 84.5%<br>(77.3%, 91.7%)                  | 99.3%<br>(99.0%, 99.7%)                  |
| Osteoarthritis | 507                 | 88                  | 1211                | 100                 | 83.5%<br>(80.6%, 86.5%) | 93.2%<br>(91.9%, 94.6%) | 85.2%<br>(82.4%, 88.1%)                  | 92.4%<br>(90.9%, 93.8%)                  |
| Epilepsy       | 130                 | 19                  | 1751                | 6                   | 95.6%<br>(92.1%, 99.0%) | 98.9%<br>(98.4%, 99.4%) | 87.3%<br>(81.9%, 92.6%)                  | 99.7%<br>(99.4%, 99.9%)                  |
| Parkinsonism   | 66                  | 11                  | 1812                | 17                  | 79.5%<br>(70.8%, 88.2%) | 99.4%<br>(99.0%, 99.8%) | 85.7%<br>(77.9%, 93.5%)                  | 99.1%<br>(98.6%, 99.5%)                  |

|                                                                                         | YES | NO | UNCERTAIN | NOT APPLICABLE |
|-----------------------------------------------------------------------------------------|-----|----|-----------|----------------|
| TITLE, KEYWORDS, ABSTRACT                                                               |     |    |           |                |
| Identify article as study of assessing diagnostic accuracy                              | X   |    |           |                |
| Identify article as a study of administrative data                                      | X*  |    |           |                |
| INTRODUCTION:                                                                           |     |    |           |                |
| State disease identification & validation one of goals of study                         | X   |    |           |                |
| METHODS:                                                                                |     |    |           |                |
| Participants in validation cohort:                                                      |     |    |           |                |
| Describe validation cohort (Cohort of patients to which reference standard was applied) |     |    |           |                |
| • Age                                                                                   | X   |    |           |                |
| • Disease                                                                               | X   |    |           |                |
| • Severity                                                                              |     |    |           | X**            |
| • Location/Jurisdiction                                                                 | X   |    |           |                |
| Describe recruitment of validation cohort                                               |     |    |           |                |
| • Inclusion criteria                                                                    | X   |    |           |                |
| • Exclusion criteria                                                                    | X   |    |           |                |
| Describe patient sampling (Random, consecutive, all, etc.)                              |     |    |           |                |
| Describe data collection                                                                |     |    |           |                |
| • Who identified patients and did selection adhere to patient recruitment criteria      | X   |    |           |                |
| • Who collected data                                                                    | X   |    |           |                |
| • <i>A priori</i> data collection form                                                  | X   |    |           |                |
| • Disease classification                                                                | X   |    |           |                |
| • Split sample (i.e. re-validation using a separate cohort)                             |     |    |           | X              |
| <i>Test Methods:</i>                                                                    |     |    |           |                |
| Describe number, training and expertise of persons reading reference standard           | X   |    |           |                |
| If >1 person reading reference standard, quote measure of consistency (e.g. kappa)      |     | X  |           |                |

|    |                                  |   |      |   |
|----|----------------------------------|---|------|---|
| 1  |                                  |   |      |   |
| 2  |                                  |   |      |   |
| 3  |                                  |   |      |   |
| 4  | Blinding of interpreters of      | X |      |   |
| 5  | reference standard to results of |   |      |   |
| 6  | classification by administrative |   |      |   |
| 7  | data e.g. Chart abstractor       |   |      |   |
| 8  | blinded to how that chart was    |   |      |   |
| 9  | coded                            |   |      |   |
| 10 |                                  |   |      |   |
| 11 |                                  |   |      |   |
| 12 | <i>Statistical Methods:</i>      |   |      |   |
| 13 | Describe methods of              | X |      |   |
| 14 | calculating/comparing            |   |      |   |
| 15 | diagnostic accuracy              |   |      |   |
| 16 |                                  |   |      |   |
| 17 |                                  |   |      |   |
| 18 | RESULTS:                         |   |      |   |
| 19 | <i>Participants:</i>             |   |      |   |
| 20 | Report when study done,          |   | X*** |   |
| 21 | start/end dates of enrollment    |   |      |   |
| 22 | Describe number of people who    | X |      |   |
| 23 | satisfied inclusion/exclusion    |   |      |   |
| 24 | criteria                         |   |      |   |
| 25 |                                  |   |      |   |
| 26 | Study flow diagram               |   | X*** |   |
| 27 | <i>Test results:</i>             |   |      |   |
| 28 | Report distribution of disease   |   |      | X |
| 29 | severity                         |   |      |   |
| 30 | Report cross-tabulation of index | X |      |   |
| 31 | tests by results of reference    |   |      |   |
| 32 | standard                         |   |      |   |
| 33 |                                  |   |      |   |
| 34 | <i>Estimates:</i>                |   |      |   |
| 35 | Report at least 4 estimates of   | X |      |   |
| 36 | diagnostic accuracy              |   |      |   |
| 37 |                                  |   |      |   |
| 38 | Diagnostic Accuracy Measures     |   |      |   |
| 39 | Reported:                        |   |      |   |
| 40 | • Sensitivity                    | X |      |   |
| 41 | • Spec                           | X |      |   |
| 42 | • PPV                            | X |      |   |
| 43 | • NPV                            | X |      |   |
| 44 | • Likelihood ratios              |   | X    |   |
| 45 | • Kappa                          |   | X    |   |
| 46 | • Area under the ROC             |   | X    |   |
| 47 | curve/c-statistic                |   |      |   |
| 48 | • Accuracy/agreement             |   | X    |   |
| 49 | • Other (specify)                |   | X    |   |
| 50 |                                  |   |      |   |
| 51 | Report accuracy for subgroups    |   |      | X |
| 52 | (e.g. age, geography, different  |   |      |   |
| 53 | sex, etc.)                       |   |      |   |
| 54 |                                  |   |      |   |
| 55 | If PPV/NPV reported, ratio of    | X |      |   |
| 56 | cases/controls of validation     |   |      |   |
| 57 |                                  |   |      |   |
| 58 |                                  |   |      |   |
| 59 |                                  |   |      |   |
| 60 |                                  |   |      |   |

|                                                              |   |  |  |  |
|--------------------------------------------------------------|---|--|--|--|
| cohort approximate prevalence of condition in the population |   |  |  |  |
| Report 95% confidence intervals for each diagnostic measure  | X |  |  |  |
|                                                              |   |  |  |  |
| DISCUSSION:                                                  |   |  |  |  |
| Discuss the applicability of the validation findings         | X |  |  |  |

\*Our study concerns EMR-derived clinical data, rather than administrative health data

\*\*It was not possible within this data source to adequately assess for severity of illness, so that was not a factor we included in the reference standard and have not reported distribution for severity of illness.

\*\*\* Study dates, including dates of enrollment were listed in the previous study (Williamson et al., 2014) which concerned the same sample as this study for the same period of time (patient data extracted on June 30, 2012). The study flow diagram has also been previously included in Williamson et al. (2014).

Confidential
